# Supplementary material
Source: Springer Nature journal article supplement (https://www.springermedizin.de/resource/supplementary/12958_2008_480_MOESM2_ESM.pdf/9568286)

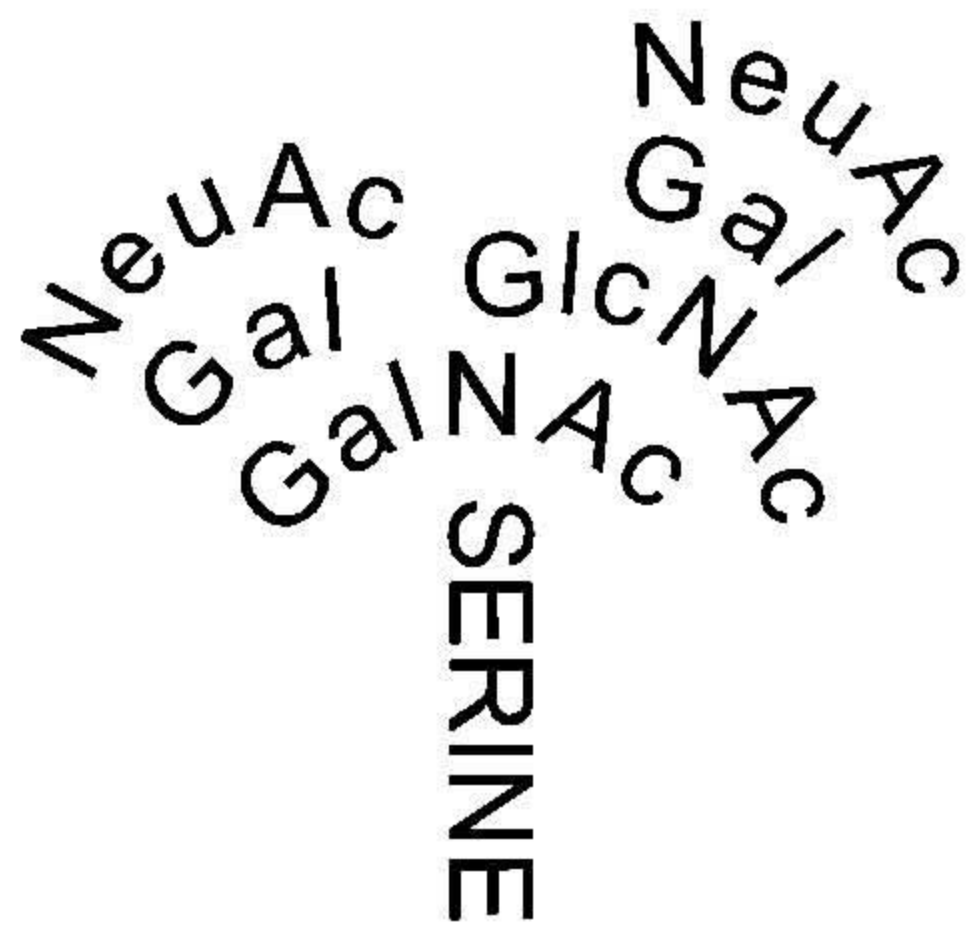

O-linked Hexa

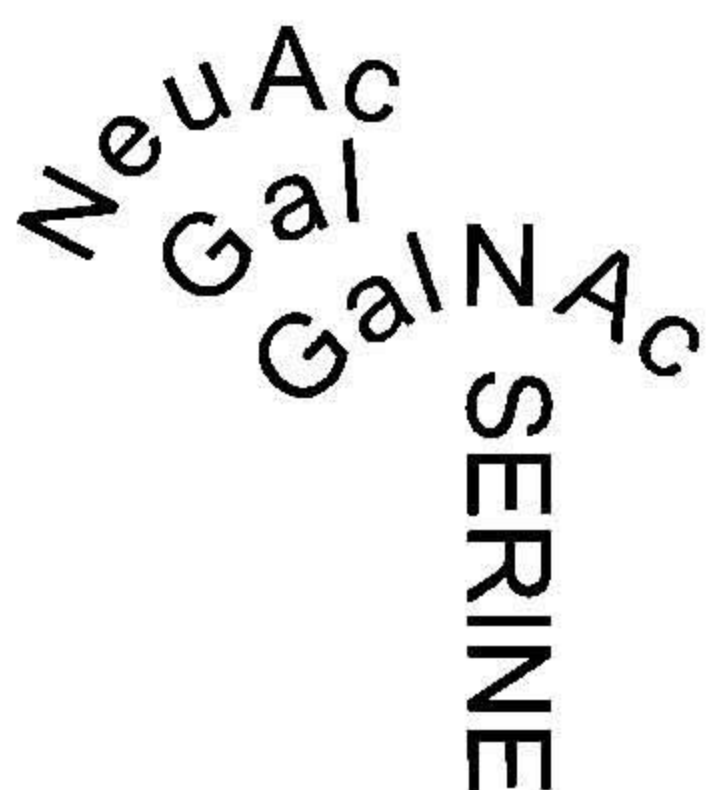

O-linked Tri

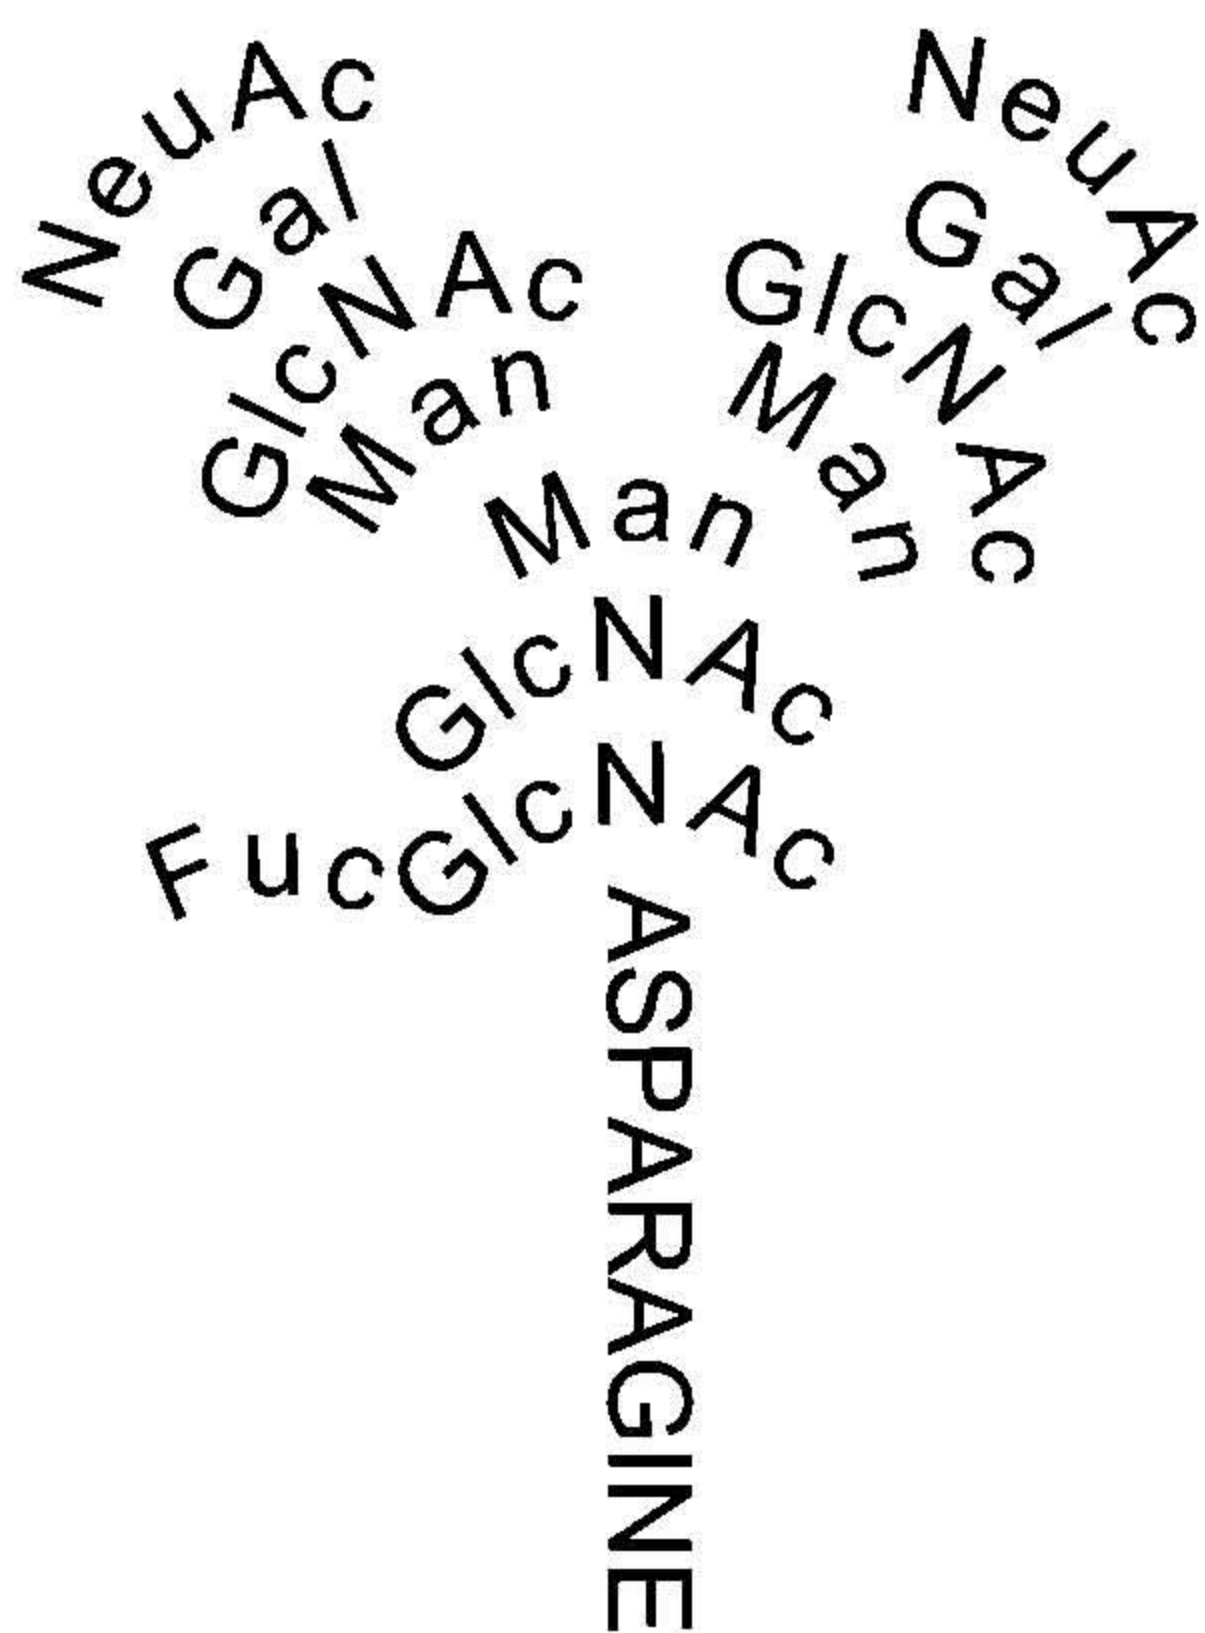

Full Bi w/fuc

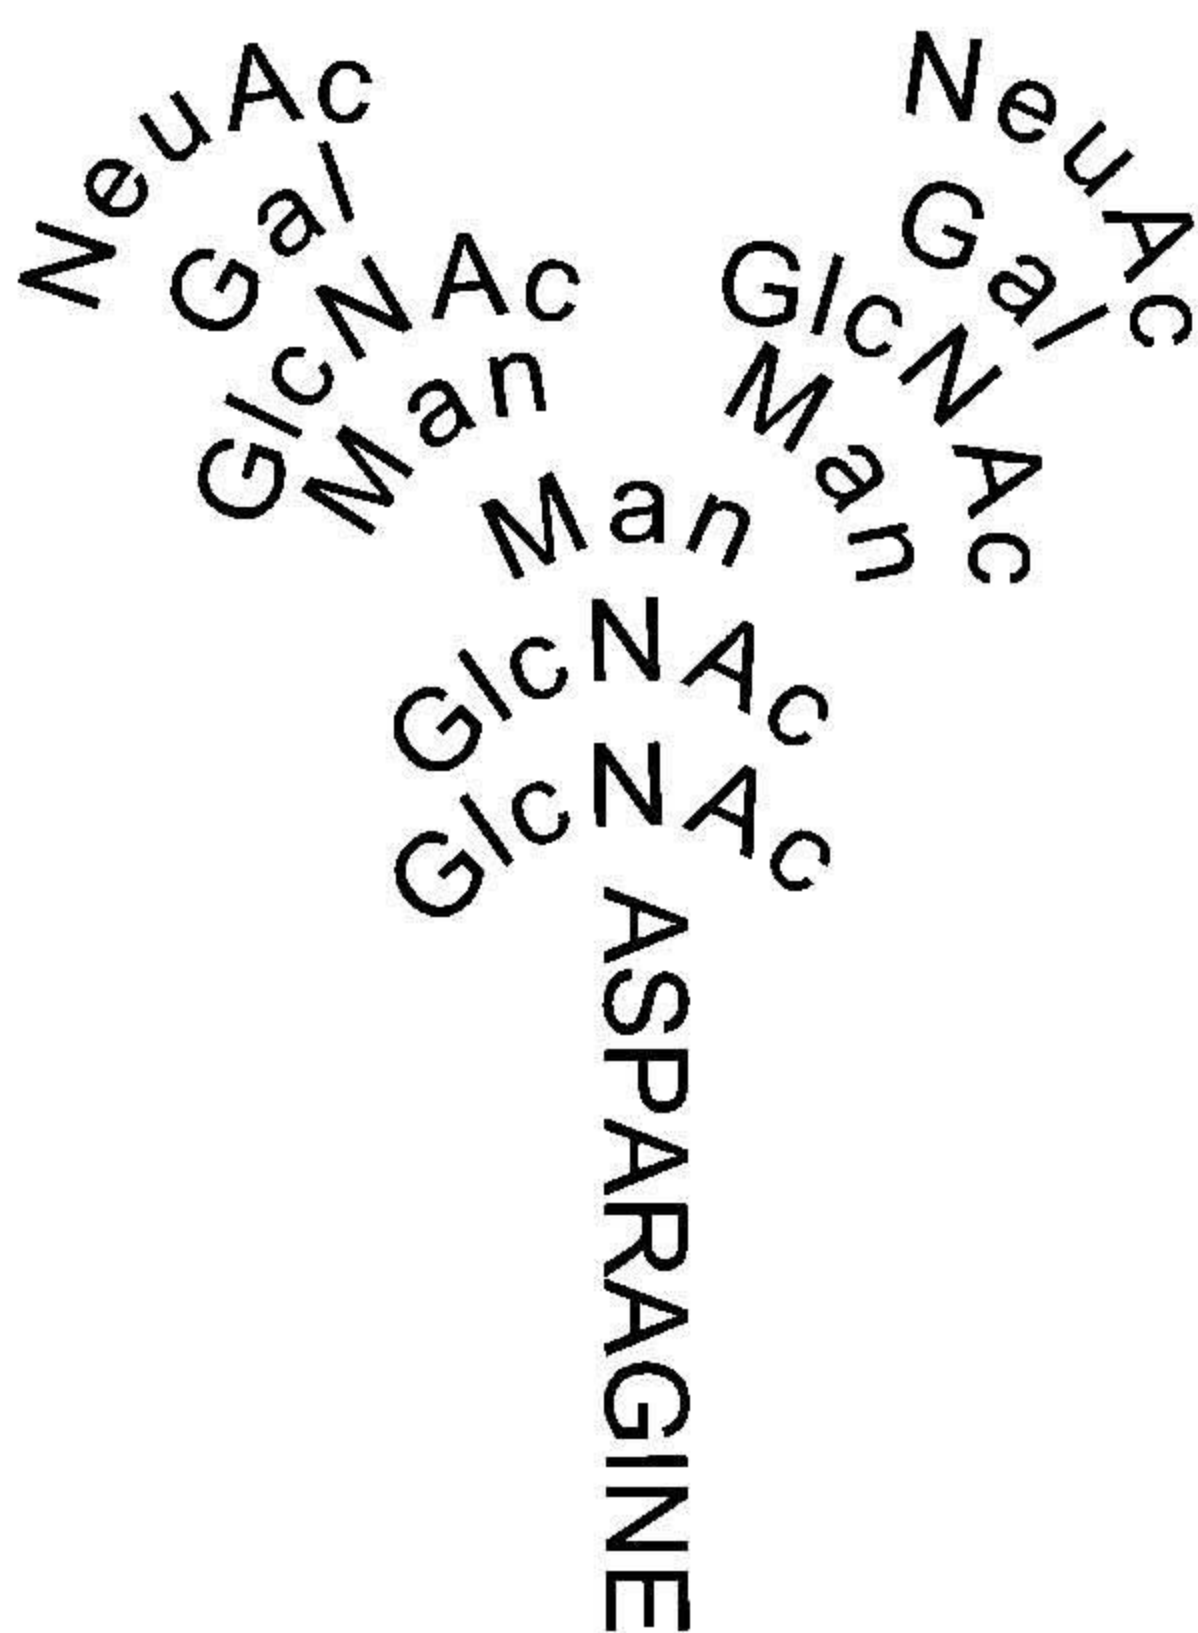

Full Bi

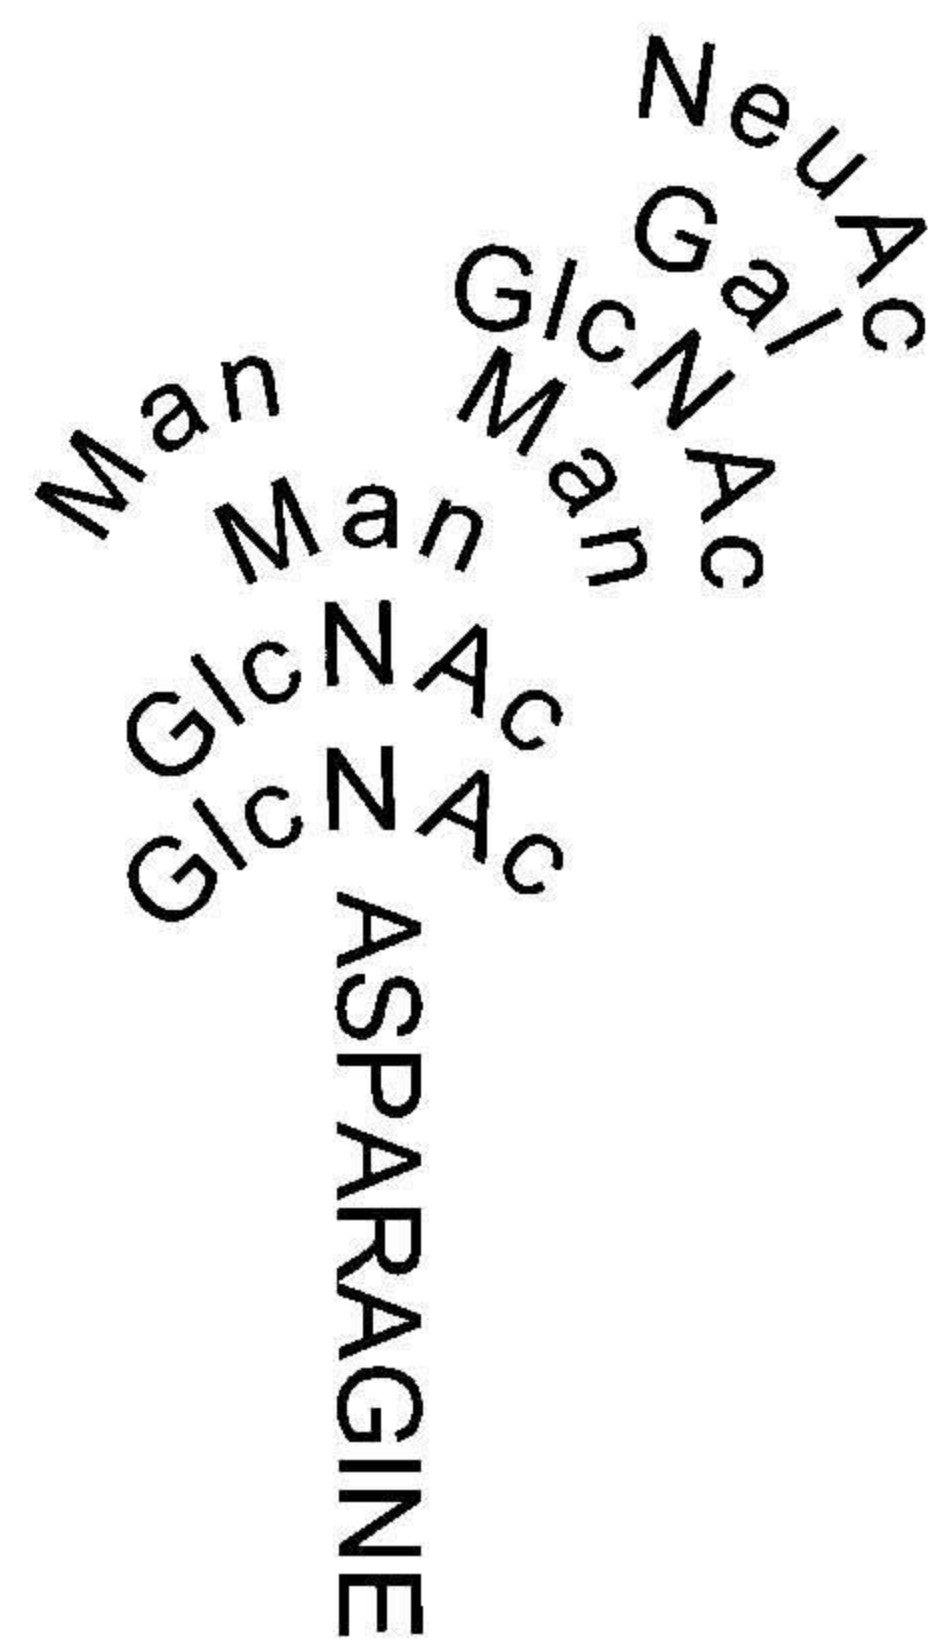

Partial Bi

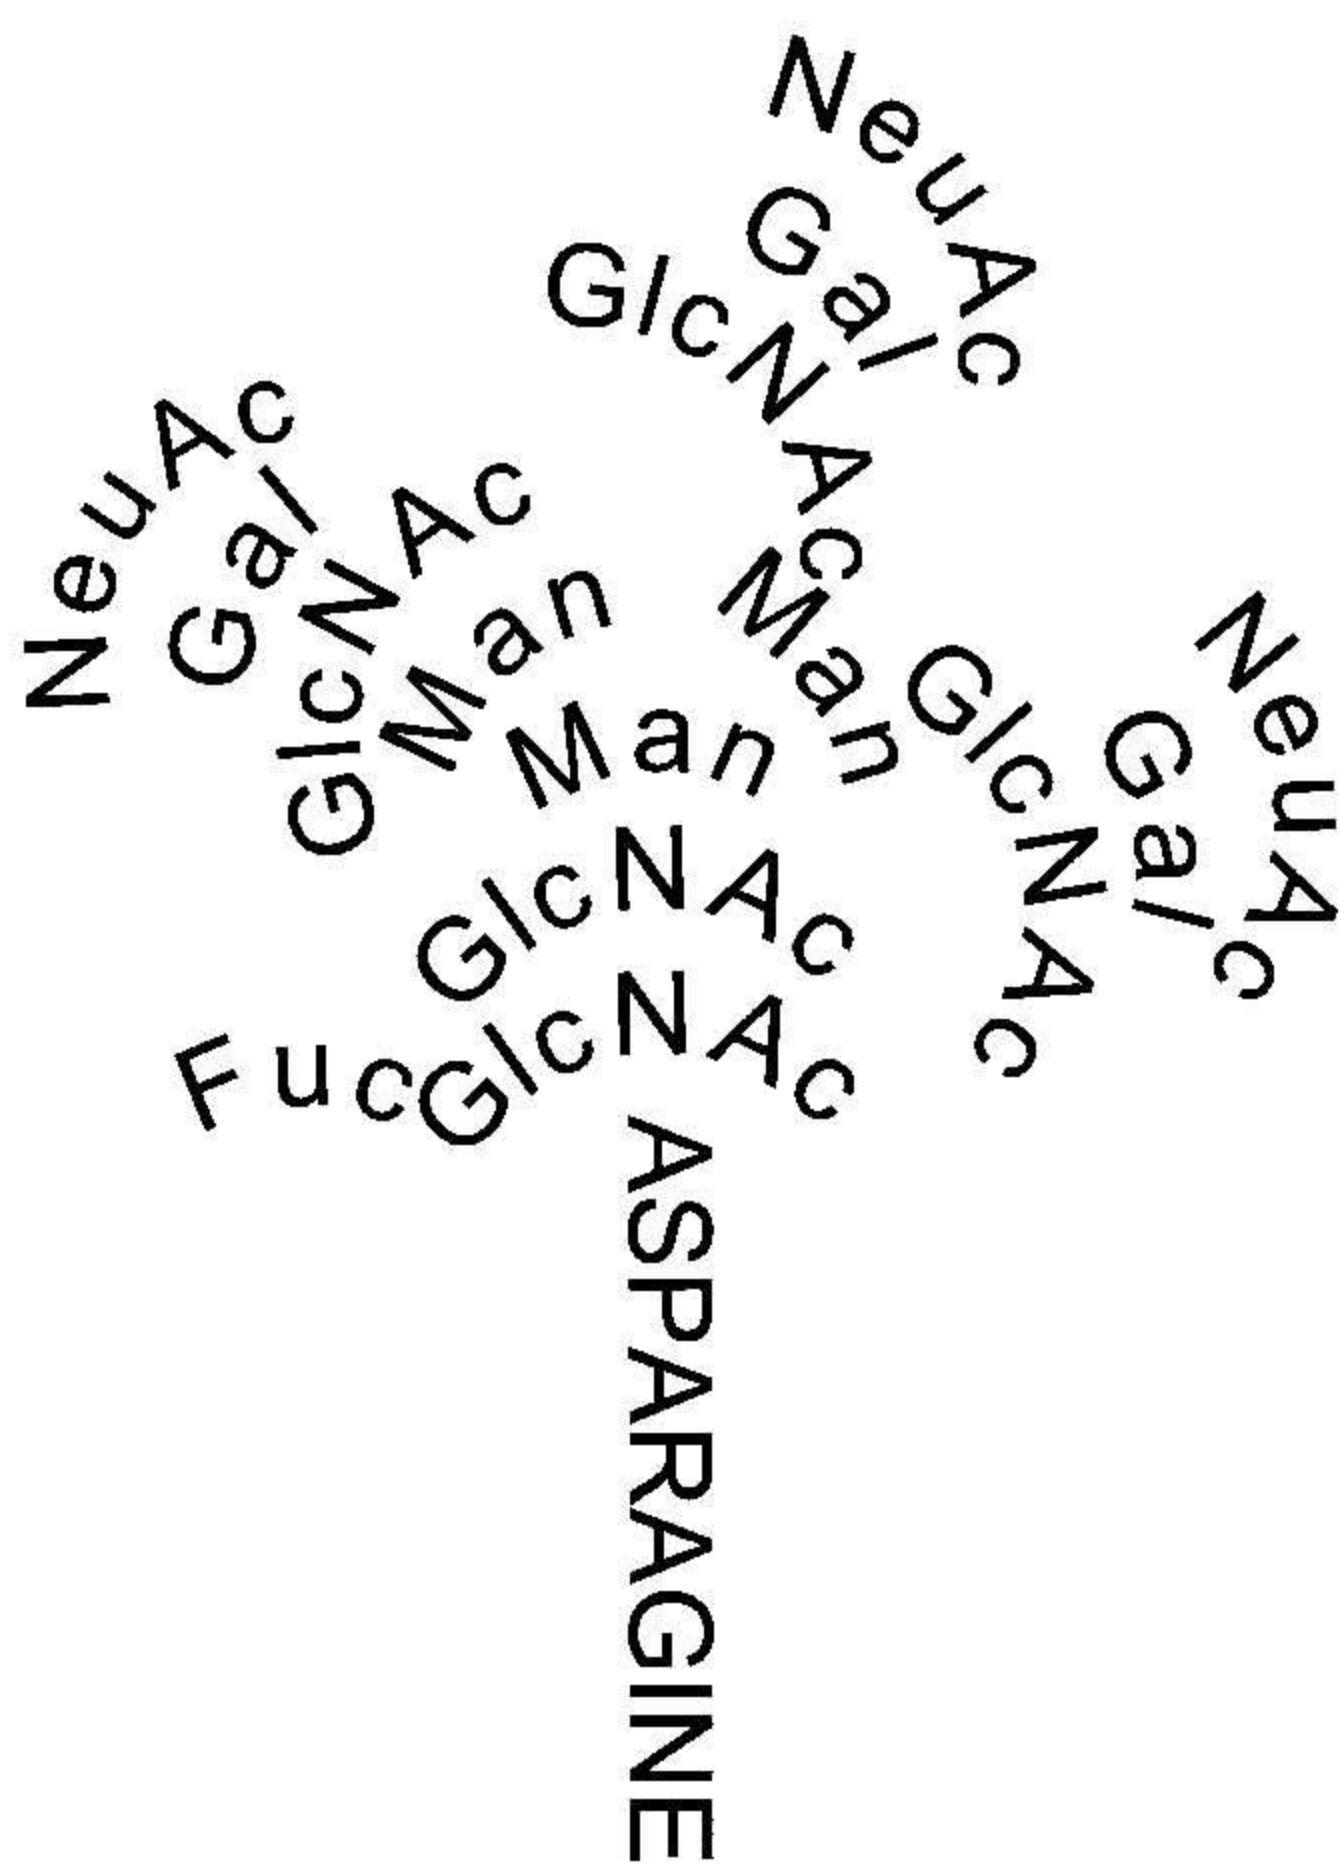

Full Tri w/fuc

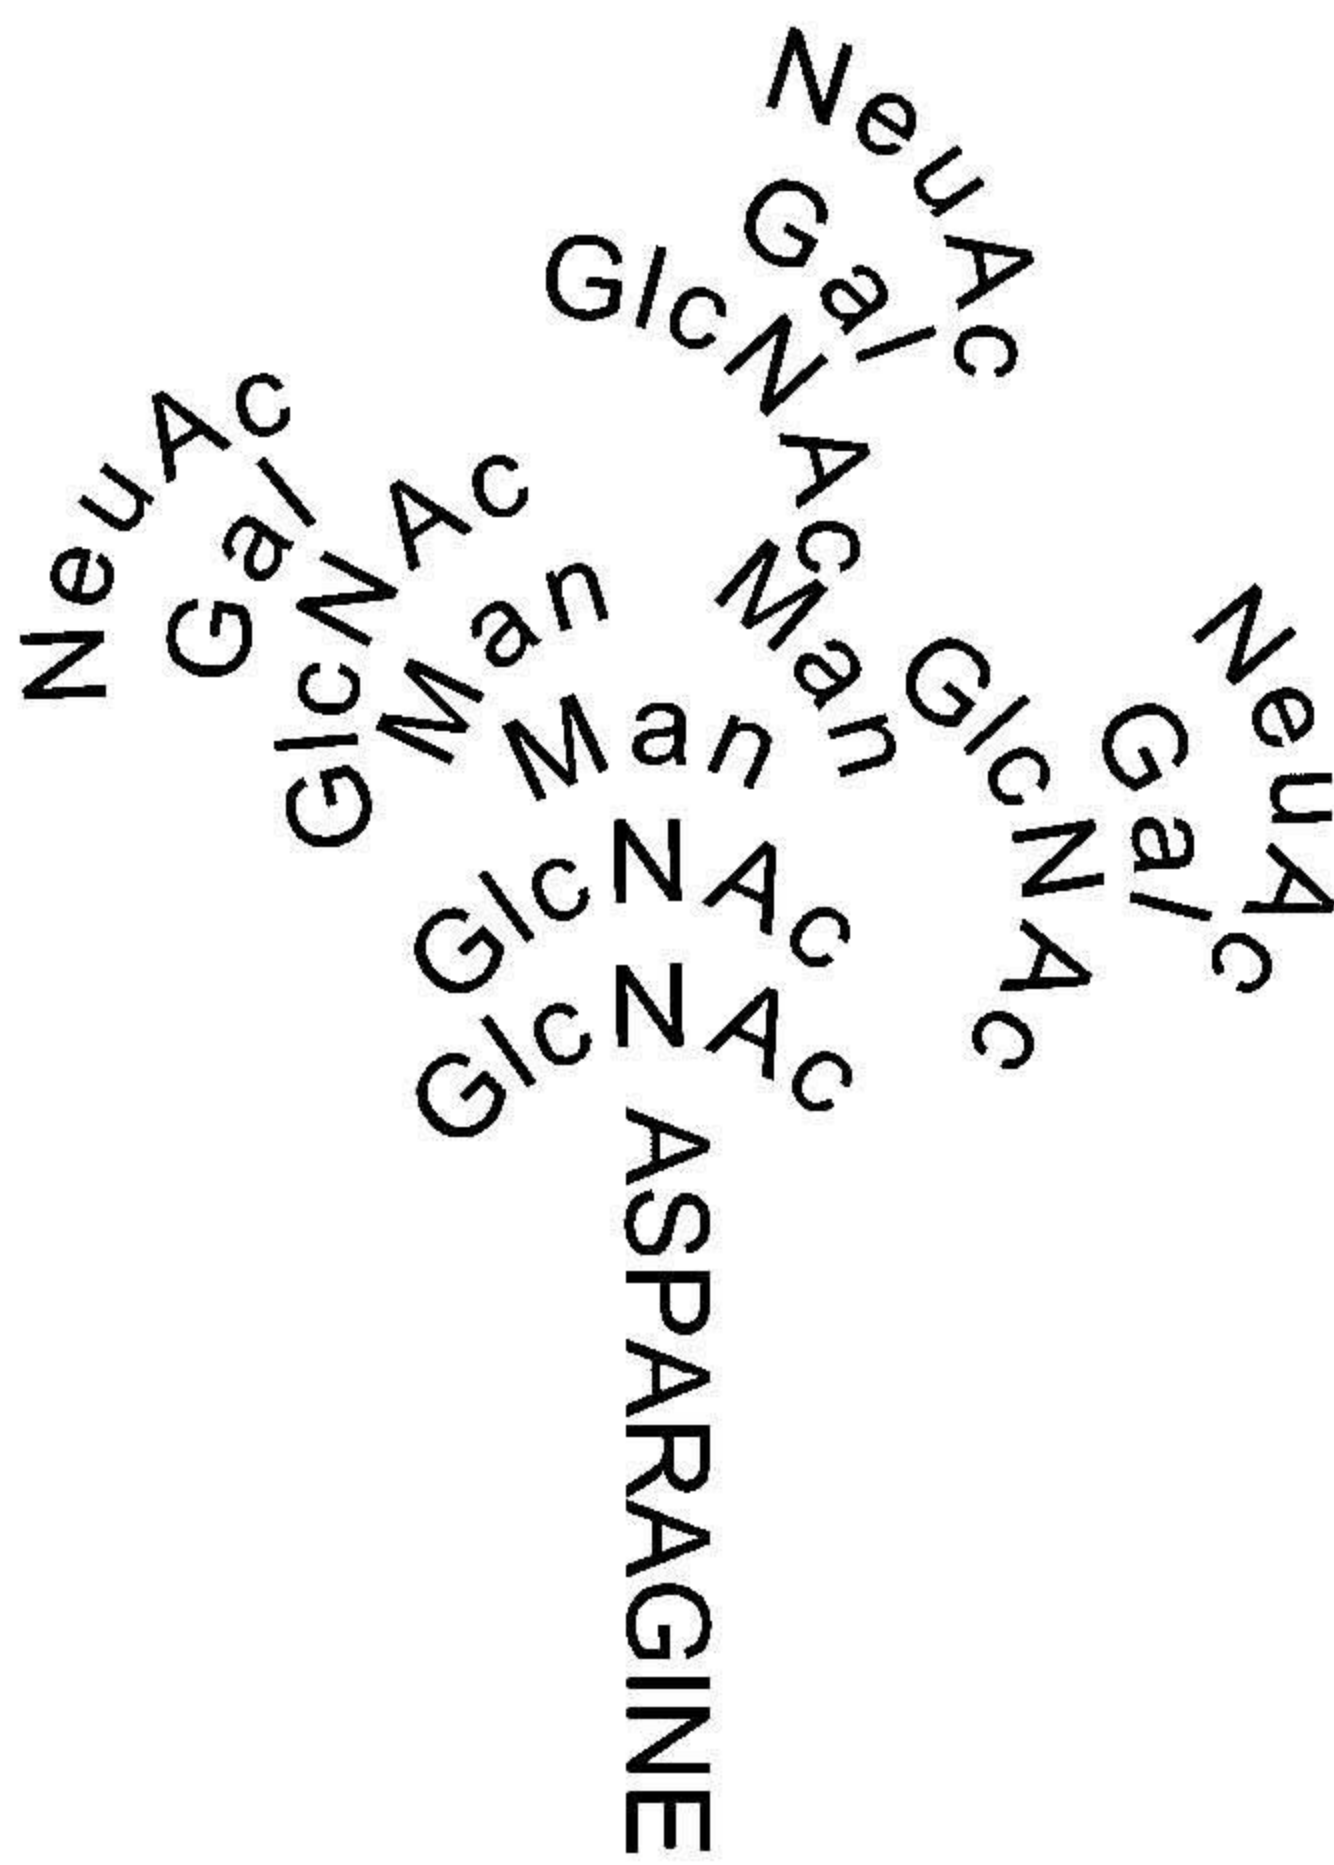

Full Tri

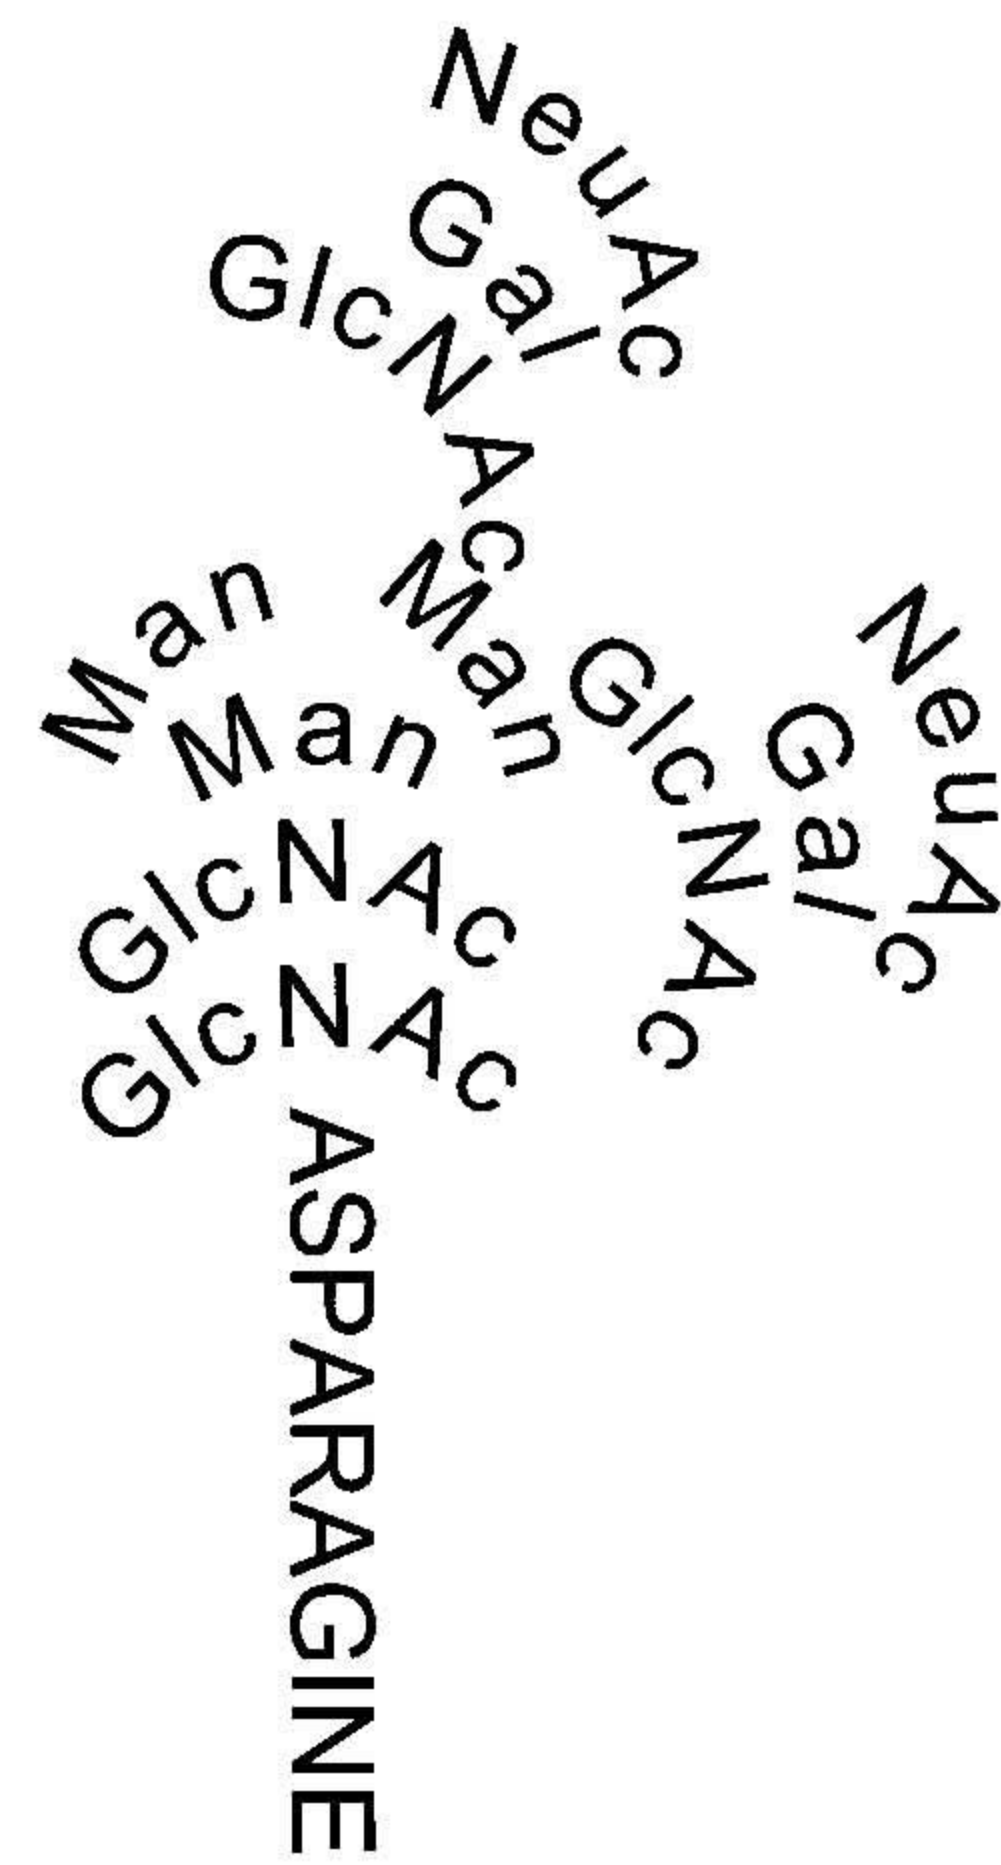

Partial Tri

Supplement: MOESM2 [file 9568286]
